# Supplementary material
Source: Springer Nature journal article supplement (https://www.springermedizin.de/resource/supplementary/13054_2012_648_MOESM6_ESM.pdf/9708942)

A

pDC

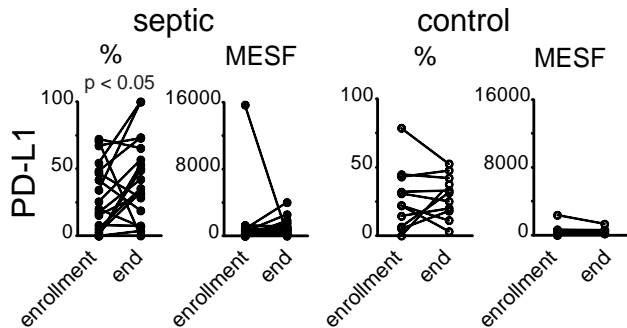

C

Treg

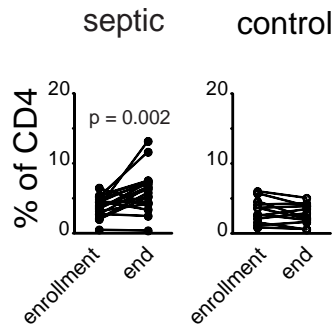

B

mDC

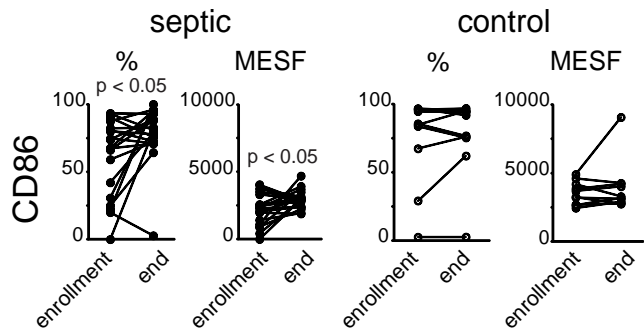

Supplement: MOESM6 [file 9708942]
